# Supplementary material for: Human sperm displays rapid responses to diet
Source: PLoS Biol. 2019 Dec 26;17(12):e3000559. doi: 10.1371/journal.pbio.3000559 (PMC6932762; doi:10.1371/journal.pbio.3000559)
Supplement: S2 Table — Contains raw data and statistical summaries for semen (including sperm motility), body and blood parameters of all participants. (XLSX) [file pbio.3000559.s011.xlsx]

## Sheet: Table S2
Table S2. Phenotypic data and results.
Sample type:			Means:			Difference Healthy vs Start:						Difference Sugar vs Healthy:						Raw data:
Semen parameters	Reference value		Start	Healthy	Sugar	Means ± SEM			Z a	p-value		Means ± SEM			Z a	p-value		S10_Start	S10_Healthy	S10_Sugar	S11_Start	S11_Healthy	S11_Sugar	S12_Start	S12_Healthy	S12_Sugar	S13_Start	S13_Healthy	S13_Sugar	S14_Start	S14_Healthy	S14_Sugar	S15_Start	S15_Healthy	S15_Sugar	S16_Start	S16_Healthy	S16_Sugar	S1_Start	S1_Healthy	S1_Sugar	S2_Start	S2_Healthy	S2_Sugar	S4_Start	S4_Healthy	S4_Sugar	S5_Start	S5_Healthy
Volym (ml)	≥1.5		2.66	2.91	2.98	0.25	±	0.21	-1.2	n.s.		0.067	±	0.19	-0.13	n.s.		2.2	1.1	2.9	2.2	2.2	2.1	3.5	2.5	1.7	1.8	3.2	3	2	3	3.5	4	4.2	4.6	3	3.5	2.7	1.2	1.3	1.8	2.2	3.3	3.3	4.4	5	4.8	1.1	2.4
Round cells (milj/ml)	≤ 5		Undetermined	Undetermined	Undetermined	-		-	-	-		-		-	-	-		undetected	undetected	undetected	undetected	undetected	undetected	undetected	undetected	undetected	undetected	undetected	undetected	undetected	undetected	undetected	undetected	undetected	undetected	undetected	undetected	undetected	undetected	undetected	undetected	undetected	undetected	undetected	undetected	undetected	undetected	undetected	>5
Leukocytes (milj/ml)	< 1		Undetermined	Undetermined	Undetermined	-		-	-	-		-		-	-	-		undetected	undetected	undetected	undetected	undetected	undetected	undetected	undetected	undetected	undetected	undetected	undetected	undetected	undetected	undetected	undetected	undetected	undetected	undetected	undetected	undetected	undetected	undetected	undetected	undetected	undetected	undetected	undetected	undetected	undetected	undetected	>1
Concentration of sperm x106/ml	≥15		32.40	32.20	28.87	-0.2	±	5.30	-0.04	n.s.		-3.34	±	3.34	-1.13	n.s.		95	71	72	52	27	22	42	45	31	4	24	10	38	22	42	15	4	5	57	22	46	34	68	45	5	5	10	15	16	15	4	28
Total amount of sperm (x106)	≥39		85.48	78.54	81.12	-6.94	±	16.62	-0.23	n.s.		2.58	±	13.91	-0.11	n.s.		209	78.1	208.8	114.4	59.4	46.2	147	112.5	52.7	7.2	76.8	30	76	66	147	60	16.8	23	171	77	124.2	40.8	88.4	81	11	16.5	33	66	80	72	4.4	67.2
Progressiv motile (PR) %	≥32		47.93	53.00	55.93	5.07	±	4.24	-0.43	n.s.		2.94	±	3.27	-1.12	n.s.		61	60	63	53	48	54	63	58	61	28	61	35	58	54	65	35	21	43	61	63	64	50	50	55	25	60	50	60	60	60	50	37
Totalt motile (PR + non-progressive) %	≥40		53.00	58.00	60.87	5	±	4.16	-0.55	n.s.		2.87	±	3.18	-1.01	n.s.		65	65	67	57	54	59	67	64	65	35	65	42	65	59	70	40	24	49	65	67	68	53	55	60	28	65	55	67	68	65	55	42
Sample type:			Means:			Difference Healthy vs Start:						Difference Sugar vs Healthy:						Raw data:
BodPod data	Reference value		Start	Healthy	Sugar	Means ± SEM			Z a	p-value		Means ± SEM			Z a	p-value		S10_Start	S10_Healthy	S10_Sugar	S11_Start	S11_Healthy	S11_Sugar	S12_Start	S12_Healthy	S12_Sugar	S13_Start	S13_Healthy	S13_Sugar	S14_Start	S14_Healthy	S14_Sugar	S15_Start	S15_Healthy	S15_Sugar	S16_Start	S16_Healthy	S16_Sugar	S1_Start	S1_Healthy	S1_Sugar	S2_Start	S2_Healthy	S2_Sugar	S4_Start	S4_Healthy	S4_Sugar	S5_Start	S5_Healthy
%fat			15.06	15.50	15.34	0.442	±	0.58	-0.57	n.s.		-0.17	±	0.45	-0.28	n.s.		18.6	19.6	17.9	12.8	11.1	12.4	17.9	17.7	18.5	16.1	17.8	15.7	17.3	15	16	9.6	9.5	9.4	15.5	14.1	16.6	8.1	10.3	10.4	11.1	16.8	13.3	18	18.83	18.4	16.7	16.9
%fatfreemass			84.94	84.59	84.66	-0.35	±	0.55	-0.51	n.s.		0.074	±	0.42	-0.11	n.s.		81.4	80.4	82.1	87.2	88.9	87.6	82.1	82.3	81.5	83.9	82.2	84.3	82.7	85	84	90.4	90.5	90.6	84.5	85.9	83.4	91.9	89.7	89.6	88.9	84	86.7	82	81.7	81.6	83.3	83.1
fat mass (kg)			11.53	11.71	11.86	0.17	±	0.46	-0.20	n.s.		0.16	±	0.36	-0.23	n.s.		16.442	17.303	15.837	9.372	8.176	9.218	10.651	10.44	11.136	11.164	12.262	11.01	13.176	11.152	12.288	7.09	6.984	7.127	9.758	8.708	10.726	5.448	7.027	7.38	8.811	12.746	11.12	14.652	14.781	14.792	10.491	10.597
fat free mass			64.30	63.55	64.85	-0.75	±	0.30	-2.16	0.03		1.31	±	0.37	-3.18	0.002		72.13	71.013	72.752	63.988	65.165	65.399	48.831	48.628	48.97	58.039	56.545	59.086	62.986	63.302	64.68	66.731	66.751	68.68	53.395	53.214	53.894	61.818	61.24	63.308	70.557	67.161	72.414	66.948	65.884	65.72	52.176	52.13
body mass (kg)			75.83	75.25	76.71	-0.58	±	0.27	-1.87	0.06		1.46	±	0.32	-3.07	0.002		88.572	88.315	88.589	73.359	73.342	74.617	59.482	59.068	60.106	69.203	68.807	70.096	76.163	74.453	76.968	73.821	73.736	75.807	63.153	61.921	64.619	67.266	68.268	70.688	79.368	79.908	83.534	81.6	80.666	80.512	62.666	62.735
body volume			71.26	70.78	72.13	-0.48	±	0.33	-1.59	n.s.		1.36	±	0.33	-2.84	0.005		83.841	83.782	83.735	68.584	68.326	69.695	56.226	55.807	56.891	65.167	65.029	65.948	71.9	69.938	72.454	68.542	68.444	70.355	59.383	58.051	60.912	62.252	63.481	65.753	73.933	75.218	78.186	77.142	76.319	76.181	59.089	59.172
bod density			1.06	1.06	1.06	-0.0009	±	0.0013	-0.54	n.s.		0.00031	±	0.0010	-0.20	n.s.		1.0564	1.0541	1.058	1.0696	1.0734	1.0706	1.0579	1.0584	1.0565	1.0619	1.05581	1.0629	1.0593	1.0646	1.0623	1.077	1.0773	1.0775	1.0635	1.0667	1.0609	1.0806	1.0754	1.0751	1.0735	1.0623	1.0684	1.0578	1.057	1.0569	1.0605	1.0602
tharacig gas volume			4.18	4.18	4.19	0.0039	±	0.0031	-1.76	0.08		0.0056	±	0.0064	-0.14	n.s.		4.434	4.434	4.434	4.281	4.281	4.376	3.62	3.667	3.667	3.762	3.762	3.762	3.943	3.943	3.943	4.662	4.662	4.662	3.829	3.829	3.829	4.038	4.039	4.039	4.944	4.954	4.945	4.199	4.199	4.199	3.85	3.85
Sample type:			Means:			Difference Healthy vs Start:						Difference Sugar vs Healthy:						Raw data:
Blood samples	Reference value		Start	Healthy	Sugar	Means ± SEM			Z a	p-value		Means ± SEM			Z a	p-value		S10_Start	S10_Healthy	S10_Sugar	S11_Start	S11_Healthy	S11_Sugar	S12_Start	S12_Healthy	S12_Sugar	S13_Start	S13_Healthy	S13_Sugar	S14_Start	S14_Healthy	S14_Sugar	S15_Start	S15_Healthy	S15_Sugar	S16_Start	S16_Healthy	S16_Sugar	S1_Start	S1_Healthy	S1_Sugar	S2_Start	S2_Healthy	S2_Sugar	S4_Start	S4_Healthy	S4_Sugar	S5_Start	S5_Healthy
B-Hb ( hemoglobin; g/L)	134-170		151.73	149.27	150.73	-2.47	±	1.7454	-1.34	n.s.		1.47	±	1.91	-0.66	n.s.		150	144	152	155	164	164	166	157	160	162	152	153	154	146	145	150	138	146	142	140	138	143	147	139	150	153	143	134	140	154	158	148
B-EVF	0,40-0,50		0.45	0.44	0.45	-0.012	±	0.0047	-2.13	0.03		0.011	±	0.006	-1.75	0.08		0.43	0.41	0.44	0.46	0.48	0.49	0.47	0.46	0.47	0.48	0.45	0.46	0.46	0.43	0.43	0.44	0.41	0.44	0.42	0.41	0.42	0.45	0.43	0.42	0.44	0.43	0.42	0.4	0.42	0.46	0.47	0.43
B-Erytrocytes ( x10*12/L)	4,3-5,7		4.83	4.72	4.83	-0.11	±	0.05	-1.91	0.06		0.11	±	0.06	-1.71	0.09		4.8	4.6	4.9	5	5.3	5.4	5.3	5.1	5.2	5.1	4.7	4.8	5	4.7	4.7	4.6	4.3	4.6	4.5	4.4	4.4	4.7	4.5	4.4	4.7	4.8	4.7	4.2	4.4	4.9	5.1	4.8
B-MCV	82-98		92.93	93.00	92.80	0.067	±	0.15	-0.45	n.s.		-0.20	±	0.20	-1.00	n.s.		90	90	90	91	91	91	89	90	90	96	96	96	92	92	92	96	96	96	94	94	95	96	96	97	92	91	91	95	95	94	91	91
Erc (B)--MCH (g/L)	320-360		31.53	31.80	31.40	0.27	±	0.15	-1.63	n.s.		-0.40	±	0.13	-2.45	0.01		32	32	31	31	31	30	31	31	31	32	32	32	31	31	31	32	32	32	32	32	31	31	33	32	32	32	31	32	32	32	31	31
Erc (B)--MCHC (g/L)	320-360		338.27	342.53	337.80	4.27	±	1.66	-2.39	0.02		-4.73	±	1.63	-2.42	0.02		350	352	348	339	344	332	351	346	340	334	339	333	338	339	337	337	334	329	336	339	330	319	341	331	345	353	340	335	334	337	337	342
B-Leucocytes (x10*9/L)	3,5-8,8		6.67	6.18	6.80	-0.49	±	0.33	-1.62	n.s.		0.62	±	0.42	-1.53	0.12		7.2	5.7	7.8	6.3	5.1	6.2	6.3	5.7	5.6	6.1	6.6	5.3	6	6.2	6.4	7.1	9	5.9	7.4	7.1	6.4	5.9	5	5.4	8.6	5.9	7.4	6.7	8.8	11.8	7.1	6.1
B-Trombocytes (x10*9/L)	140-350		244.40	230.40	243.20	-14.00	±	2.26	-3.42	0.001		12.80	±	5.53	-2.33	0.02		171	156	181	282	275	293	281	263	256	259	255	258	264	263	277	217	202	224	274	247	257	242	227	232	223	205	157	256	245	277	223	199
P-CPR (mg/L)	<10		Undetermined	Undetermined	Undetermined	-		-	-	-		-		-	-	-		<5	<5	<5	<1,5	<5	<5	<5	<5	<5	<5	<5	<5	<5	<5	<5	<1,5	<5	<5	<5	<5	<5	<5	<5	<5	<5	<5	<5	<5	<5	<5	<5	<5
P/S--Interleukin-6 (ng/L)	<7		Undetermined	Undetermined	Undetermined	-		-	-	-		-		-	-	-		2	1.9	<1.5	undetected	<1.5	<1.5	<1.5	<1.5	<1.5	<1.5	2	<1.5	<1.5	<1.5	<1.5	undetected	<1.5	<1.5	<1.5	2	<1.5	undetected	undetected	undetected	undetected	undetected	undetected	undetected	undetected	undetected	undetected	undetected
P-Albumin (g/L)	36-48		47.13	46.13	46.20	-1	±	0.86	-1.07	n.s.		0.067	±	0.65	-0.2	n.s.		50	46	48	46	47	49	46	45	48	52	47	46	46	46	47	53	46	48	48	49	49	49	43	44	48	48	44	42	47	45	45	45
P-Bilirubin (umol/L)	<26		11.53	9.80	8.40	-1.73	±	0.81	-1.92	0.06		-1.40	±	1.04	-1.26	n.s.		7	6	7	13	10	5	13	13	14	29	20	20	10	8	4	10	6	5	5	7	3	8	8	3	14	11	7	7	6	13	6	10
P--Alkaline phosphatase (ukat/L)	0,6-1,8		1.08	1.12	1.19	0.037	±	0.023	-1.60	n.s.		0.067	±	0.031	-1.79	0.07		1.1	1.2	1.3	0.9	1	1.1	0.87	0.9	1	1	1.1	0.99	0.78	0.8	0.81	1.4	1.4	1.4	1.2	1.4	1.6	1.3	1.3	1.1	0.69	0.64	0.66	1.2	1.3	1.4	1.1	1
P-ASAT (ukat/L)	<0,76		0.55	0.53	0.49	-0.022	±	0.026	-0.88	n.s.		-0.038	±	0.056	-0.28	n.s.		0.56	0.5	0.45	0.64	0.59	0.5	0.41	0.45	0.62	0.38	0.45	0.39	0.61	0.62	0.54	0.7	0.63	0.62	0.6	0.74		0.43	0.47	0.59	0.48	0.5	0.56	0.41	0.41	0.6	0.53	0.44
P-ALAT (ukat/L)	<1,2		0.42	0.46	0.54	0.037	±	0.022	-1.47	n.s.		0.088	±	0.051	-1.59	0.11		0.4	0.44	0.37	0.42	0.42	0.41	0.46	0.48	0.73	0.31	0.3	0.28	0.48	0.5	0.46	0.43	0.4	0.51	0.41	0.63	1.3	0.38	0.45	0.6	0.3	0.36	0.5	0.3	0.37	0.54	0.34	0.34
P-GT (ukat/L)	<1,4		0.30	0.29	0.34	-0.01	±	0.012	-1.77	0.08		0.055	±	0.032	-2.05	0.04		0.27	0.23	0.23	0.22	0.2	0.21	0.33	0.27	0.39	0.25	0.24	0.2	0.31	0.28	0.29	0.32	0.3	0.34	0.71	0.84	1.3	0.37	0.36	0.34	0.16	0.17	0.21	0.2	0.18	0.24	0.25	0.23
P-cholesterol (mmol/L)	2,9-6,1		4.59	4.38	4.46	-0.21	±	0.130	-1.96	0.05		0.080	±	0.071	-1.09	n.s.		5.6	5.3	5.4	3.8	3.7	3.8	4	3.7	3.7	5.1	4.2	4.1	3.2	3.3	2.9	4.8	4.2	4.4	3.8	3.9	3.9	5.3	4.9	5.2	4.4	3.8	4.2	3.5	3.5	4.2	5.4	4.6
S-triglycerides (mmol/L)	0,45-2,6		1.20	1.08	2.13	-0.12	±	0.08	-1.17	n.s.		1.05	±	0.24	-3.15	0.002		1.8	1.5	3.8	0.43	0.66	1.6	1.3	0.9	2.1	1.3	1.1	1.6	0.97	1.1	1.7	0.86	1.1	1.5	0.92	0.55	1.9	0.35	0.51	0.78	1	1.1	2.2	1.2	1.3	1	0.82	0.66
P-HDL-cholesterol (mmol/L)	0,8-2,1		1.55	1.49	1.36	-0.06	±	0.05	-1.27	n.s.		-0.13	±	0.06	-2.09	0.04		1.1	1.1	0.86	1.6	1.4	1.3	1.3	1.3	1.2	1.7	1.4	1.4	1	1.1	1	2.1	1.7	1.8	1.7	2	1.6	2.5	2.5	2.3	1.2	1.2	0.99	1.3	1.3	1.7	2	2.1
S-LDL-cholesterol (mmol/L)	1,2-4,3		2.47	2.38	1.77	-0.087	±	0.14	-1.27	n.s.		-0.61	±	0.41	-1.61	0.11		3.7	3.5	2.8	1.9	2	1.8	2.1	2	1.6	2.8	2.3	2	1.7	1.7	1.1	2.2	2	1.9	1.7	1.7	1.4	2.7	2.2	2.5	2.8	2.1	2.2	1.7	1.5	2	3	2.2
P--NON-HDL-cholesterol			3.02	2.87	3.08	-0.15	±	0.12	-1.64	n.s.		0.21	±	0.07	-2.50	0.01		4.5	4.2	4.5	2.1	2.3	2.5	2.7	2.4	2.5	3.4	2.8	2.8	2.2	2.2	1.9	2.7	2.5	2.6	2.1	1.9	2.3	2.8	2.5	2.8	3.3	2.6	3.2	2.2	2.1	2.5	3.3	2.5
Total/HDL-ratio			3.12	3.11	3.54	-0.017	±	0.10	-0.66	n.s.		0.43	±	0.14	-2.50	0.01		5.09	4.82	6.28	2.38	2.64	2.92	3.08	2.85	3.08	3	3	2.93	3.2	3	2.9	2.29	2.47	2.44	2.24	1.95	2.44	2.12	1.96	2.26	3.67	3.17	4.24	2.69	2.69	2.47	2.7	2.19
fp_glucose	4,2-6,0		5.13	5.09	5.15	-0.047	±	0.1191	-0.84	n.s.		0.060	±	0.098	-0.53	n.s.		4.8	4.7	5.3	5	5.4	5	5.3	4.9	4.9	4.8	4.9	4.5	5	5	5.3	5.4	5.2	5.4	5	5.1	4.9	5.1	4.9	4.9	5.6	4.8	4.7	5.3	5	4.8	4.7	5.9
a Wilcoxon Signed Ranks Test
[truncated: 13 more columns]
