# Supplementary material for: Human sperm displays rapid responses to diet
Source: PLoS Biol. 2019 Dec 26;17(12):e3000559. doi: 10.1371/journal.pbio.3000559 (PMC6932762; doi:10.1371/journal.pbio.3000559)
Supplement: S3 Table — Contains the DEseq2 results from a targeted analysis on miRNA annotated by Sports. (XLSX) [file pbio.3000559.s012.xlsx]

## Sheet: Table S3
Table S3. Changes in sperm miRNA following a high-sugar diet.
			DEseq2 results
RNA sequence	Length	Annotations	baseMeans	Log2 Fold changes	p	FDR p*	n occurance
AAGCAGGGTCGGGCCTG	17	hsa-mir-7641-2	35.52	0.63	0.001	n.s.	20
CTCGGAAGCTAAGCAGGGTCGGGCCTGGTTAGTACTTGGA	40	hsa-mir-7641-2	224.49	0.47	0.014	n.s.	20
CGGAAGCTAAGCAGGGTCGGGCCTGGTTAGTACTTGG	37	hsa-mir-7641-2	221.62	0.54	0.014	n.s.	20
AGCTAAGCAGGGTCGGGCCTGGTTAGTACTTG	32	hsa-mir-7641-2	41.11	0.53	0.022	n.s.	20
TCGGAAGCTAAGCAGGGTCGGGCCTGGTTAGTACTTG	37	hsa-mir-7641-2	15.06	0.61	0.022	n.s.	20
AGCTAAGCAGGGTCGGGCCTGGTT	24	hsa-mir-7641-2	18.24	0.51	0.026	n.s.	20
CGGAAGCTAAGCAGGGTCGGGCCTGGTTAGTACTTG	36	hsa-mir-7641-2	76.93	0.51	0.028	n.s.	20
CTAAGCAGGGTCGGGCCT	18	hsa-mir-7641-2	81.63	0.37	0.033	n.s.	20
TCGGAAGCTAAGCAGGGTCGGGC	23	hsa-mir-7641-2	56.23	0.38	0.036	n.s.	20
GCTAAGCAGGGTCGGGCCTGGT	22	hsa-mir-7641-2	50.69	0.40	0.036	n.s.	20
CTAAGCAGGGTCGGGCCTGGTT	22	hsa-mir-7641-2	27.02	0.49	0.037	n.s.	20
GCTAAGCAGGGTCGGGC	17	hsa-mir-7641-2	176.84	0.36	0.040	n.s.	20
CGGAAGCTAAGCAGGGTCGGGCCTGGTTAGTACTTGGATGG	41	hsa-mir-7641-2	374.04	0.39	0.041	n.s.	20
CTCGGAAGCTAAGCAGGGTCGGGCCTGGTTAGTACTTGGATG	42	hsa-mir-7641-2	35.66	0.50	0.042	n.s.	20
CGGAAGCTAAGCAGGGTCGGGCCT	24	hsa-mir-7641-2	88.05	0.43	0.043	n.s.	20
CTAAGCAGGGTCGGGCCTGGTTAGTACTTGGATGGGAG	38	hsa-mir-7641-2	97.97	0.34	0.044	n.s.	20
ATCTCGGAAGCTAAGCAGGGTCGGGCCTGGTTAGTACTTGG	41	hsa-mir-7641-2	40.17	0.41	0.044	n.s.	20
CAGGGTCGGGCCTGGTTAGTACTTG	25	hsa-mir-7641-2	129.38	0.31	0.046	n.s.	20
CAGGGTCGGGCCTGGTTAGTACTTGGATGGGAG	33	hsa-mir-7641-2	299.53	0.34	0.050	n.s.	20
TCTCGGAAGCTAAGCAGGGT	20	hsa-mir-7641-2;hsa-mir-7641-1	18.23	-0.52	0.037	n.s.	20
GCTGGTCTGCGTGGTGCTCGG	21	hsa-mir-3663	22.39	0.75	0.004	n.s.	3
GCTGGTCTGCGTGGTGCTCG	20	hsa-mir-3663	70.29	0.53	0.010	n.s.	3
GCTGGTCTGCGTGGTGCTC	19	hsa-mir-3663	41.52	0.51	0.029	n.s.	3
AATGACACGATCACTCCCGTTGA	23	hsa-mir-425	54.47	0.49	0.019	n.s.	3
AATGACACGATCACTCCCGTT	21	hsa-mir-425	43.35	0.42	0.028	n.s.	3
AATGACACGATCACTCCCGTTGAG	24	hsa-mir-425	86.78	0.43	0.045	n.s.	3
ACTAGATTGTGAGCTCCTGGA	21	hsa-mir-28	51.71	0.46	0.043	n.s.	2
AAGGAGCTCACAGTCTATTG	20	hsa-mir-28	235.78	0.38	0.043	n.s.	2
AAGGGCTTCCTCTCTGCAG	19	hsa-mir-3158-1;hsa-mir-3158-2	86.91	0.47	0.030	n.s.	2
AAGGGCTTCCTCTCTGCAGGA	21	hsa-mir-3158-1;hsa-mir-3158-2	144.07	0.36	0.038	n.s.	2
TGATTGTAGCCTTTTGGAGTAG	22	hsa-mir-508	43.35	0.50	0.026	n.s.	2
TGATTGTAGCCTTTTGGAGTAGA	23	hsa-mir-508	42.33	0.59	0.037	n.s.	2
CATCTGGAGGTAAGAAGCACTTT	23	hsa-mir-516b-2;hsa-mir-516b-1	102.53	0.49	0.017	n.s.	2
ATCTGGAGGTAAGAAGCACT	20	hsa-mir-516b-2;hsa-mir-516b-1	304.59	0.49	0.022	n.s.	2
CACCCGGCTGTGTGCACATG	20	hsa-mir-941-1;hsa-mir-941-5;hsa-mir-941-4;hsa-mir-941-3;hsa-mir-941-2	38.11	0.58	0.010	n.s.	2
CACCCGGCTGTGTGCACATGT	21	hsa-mir-941-2;hsa-mir-941-1;hsa-mir-941-5;hsa-mir-941-4;hsa-mir-941-3	170.93	0.50	0.027	n.s.	2
CCGCACTGTGGGTACTTG	18	hsa-mir-106b	24.95	0.47	0.040	n.s.	1
ACCGTGGCTTTCGATTGTTACT	22	hsa-mir-132	54.43	0.37	0.041	n.s.	1
AGTGTGCGGAAATGCTTCTG	20	hsa-mir-147b	20.23	0.58	0.011	n.s.	1
ACTAGACTGAAGCTCCTTGAG	21	hsa-mir-151a	43.45	0.46	0.025	n.s.	1
TGGACGGAGAACTGATAAGG	20	hsa-mir-184	291.17	0.37	0.034	n.s.	1
TGTAACAGCAACTCCATGTGGA	22	hsa-mir-194-1;hsa-mir-194-2	79.73	0.51	0.014	n.s.	1
TTCCCTTTGTCATCCTATGCC	21	hsa-mir-204	20.70	0.44	0.036	n.s.	1
ATGACCTATGAATTGAC	17	hsa-mir-215	84.86	0.44	0.036	n.s.	1
TGTAAACATCCTACACTCTC	20	hsa-mir-30c-1;hsa-mir-30c-2	77.95	0.42	0.049	n.s.	1
AAAGTGCTGCGACATTTGAGCG	22	hsa-mir-372	56.60	0.40	0.038	n.s.	1
AATGCACCCGGGCAAGGATT	20	hsa-mir-501	50.14	0.49	0.013	n.s.	1
AAAGCGCTTCCCTTCAGAGT	20	hsa-mir-518e	55.66	0.55	0.005	n.s.	1
CTCTAGAGGGAAGCGCTTTCT	21	hsa-mir-519b;hsa-mir-519c;hsa-mir-523;hsa-mir-519a-1;hsa-mir-518e;hsa-mir-522	73.01	0.62	0.004	n.s.	1
ACAAAGTGCTTCCCTTTAGAGT	22	hsa-mir-520g;hsa-mir-520h	21.65	0.59	0.023	n.s.	1
AAGATGTGGAAAAATTGGAAT	21	hsa-mir-576	54.30	0.51	0.022	n.s.	1
GAGGGGCTCTCGCTTCTGGCGCC	23	hsa-mir-6087	23.58	-0.45	0.044	n.s.	1
ACTGGCTAGGGAAAATGATTGG	22	hsa-mir-664a	61.67	0.56	0.015	n.s.	1
TGGAAGACTAGTGATTTT	18	hsa-mir-7-2;hsa-mir-7-1;hsa-mir-7-3	82.03	0.51	0.010	n.s.	1
TGAGACCTCTGGGTTCTGAG	20	hsa-mir-769	225.53	0.38	0.045	n.s.	1
* Top results (p<0.05) from a repeated mesure analysis using the R package DEseq2 (Love MI, Huber W, Anders S, 2014, Genome Biology). To avoid problems of multiple testing, analysis was performed specifically on miRNA after rsRNA and tsRNA were removed for analysis using different strategies. FDR indicates p-value correction using the default Benjamini & Hochberg proceedure in DEseq2.
